# Supplementary material for: Multifunctional zwitterionic microneedle dressings for accelerated healing of chronic infected wounds in diabetic rat models
Source: Royal Society of Chemistry journal article supplement (doi:10.1039/d2bm02101c), 2023-01-01
Supplement: d2bm02101c1.pdf [file d2bm02101c1.pdf]

## Supporting Information

*of*

### **Multifunctional Zwitterionic Microneedle Dressings for Accelerated Healing of Chronic Infected Wound in Diabetic**

*Cai Yuqing<sup>#</sup>, Xu Xiaodong<sup>#</sup>, Wu Minmin, Liu Jiaqi, Feng Jie<sup>\*</sup>, Zhang Jing<sup>\*</sup>*

College of Materials Science and Engineering, Zhejiang University of Technology, Hangzhou, Zhejiang, 310014, P. R. China.

<sup>#</sup>These authors contribute to this work equally.

<sup>\*</sup>Corresponding authors:

Email : zhangjing@zjut.edu.cn (J. Zhang), fengjie@zjut.edu.cn (J. Feng).

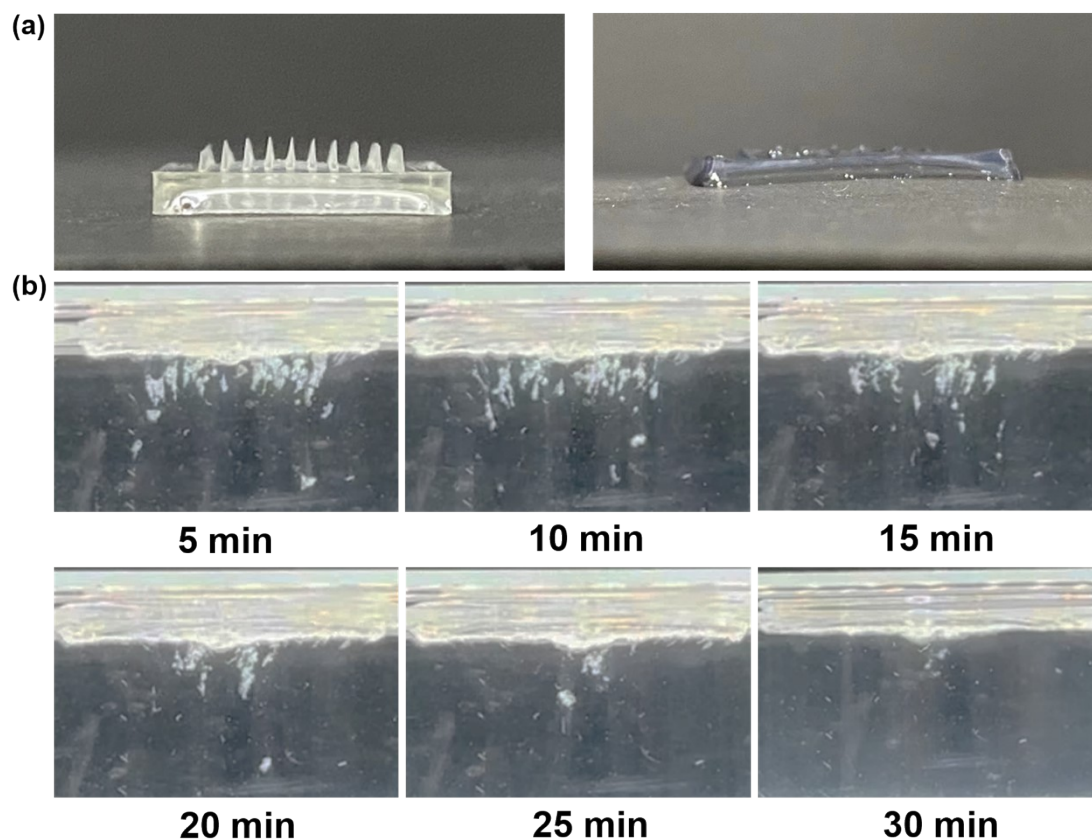

Fig. S1. (a) The images before (left) and after (right) microneedle tips degradation. (b) The images of microneedle tips degradation.

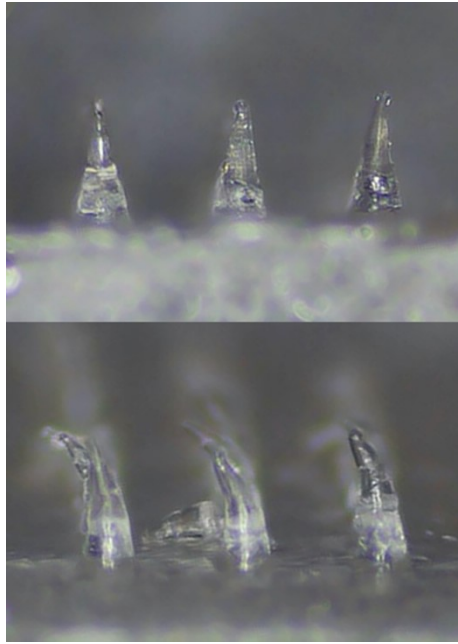

Fig. S2. Morphological changes of microneedles before and after pressure.

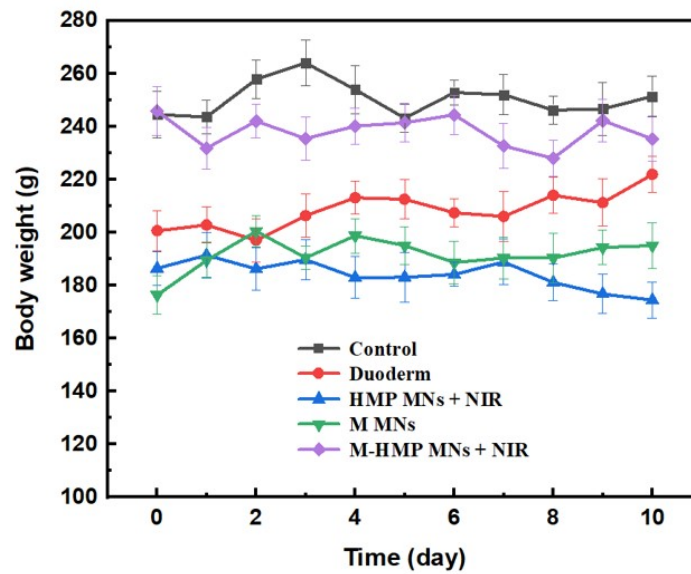

Figure S3. Body weight change curve of SD rats.

Table S1. Blood glucose value of SD rats before and after treatment.

|                 | 0 Day     | 10 Day    |
|-----------------|-----------|-----------|
| Control         | > 33.3 mM | > 33.3 mM |
| Duoderm         | > 33.3 mM | 25.7 mM   |
| HMP MNs + NIR   | > 33.3 mM | > 33.3 mM |
| M MNs           | 23.8 mM   | > 33.3 mM |
| M-HMP MNs + NIR | 32.8 mM   | > 33.3 mM |
